# Supplementary material for: BSA Binding and Aggregate Formation of a Synthetic Amino Acid with Potential for Promoting Fibroblast Proliferation: An In Silico, CD Spectroscopic, DLS, and Cellular Study
Source: MDPI journal article supplement (doi:10.3390/biom14050579), 2024-05-14
Supplement: s1 [file s1]

## Supplementary Information

# BSA binding and aggregate formation of a synthetic amino acid with potential for promoting fibroblast proliferation: an in silico, CD spectroscopic, DLS, and cellular study

Hayarpi Simonyan<sup>1#</sup>, Rosanna Palumbo<sup>2#</sup>, Satenik Petrosyan<sup>1</sup>, Anna Mkrtchyan<sup>1</sup>, Armen Galstyan<sup>3</sup>, Ashot Saghyan<sup>1</sup>, Pasqualina Liana Scognamiglio<sup>4</sup>, Caterina Vicidomini<sup>2</sup>, Marta Fik-Jaskolka<sup>5</sup>, Giovanni N. Roviello<sup>2\*</sup>

<sup>1</sup> Institute of Pharmacy, Yerevan State University, 1 Alex Manoogian Str., Yerevan 0025, Armenia

<sup>2</sup> Institute of Biostructures and Bioimaging, Italian National Council for Research (IBB-CNR), Area di Ricerca Site and Headquarters, Via Pietro Castellino 111, 80131 Naples, Italy

<sup>3</sup> Department of Chemistry, Yerevan State University, 1 Alex Manoogian Str., Yerevan 0025, Armenia

<sup>4</sup> Department of Sciences, University of Basilicata, Via dell'Ateneo Lucano 10, 85100 Potenza, Italy

<sup>5</sup> Faculty of Chemistry, Adam Mickiewicz University in Poznań, Uniwersytetu Poznańskiego 8, 61-614 Poznań, Poland

\* Correspondence: giovanni.roviello@cnr.it; +390812203415

<sup>#</sup>these authors contributed equally to this work

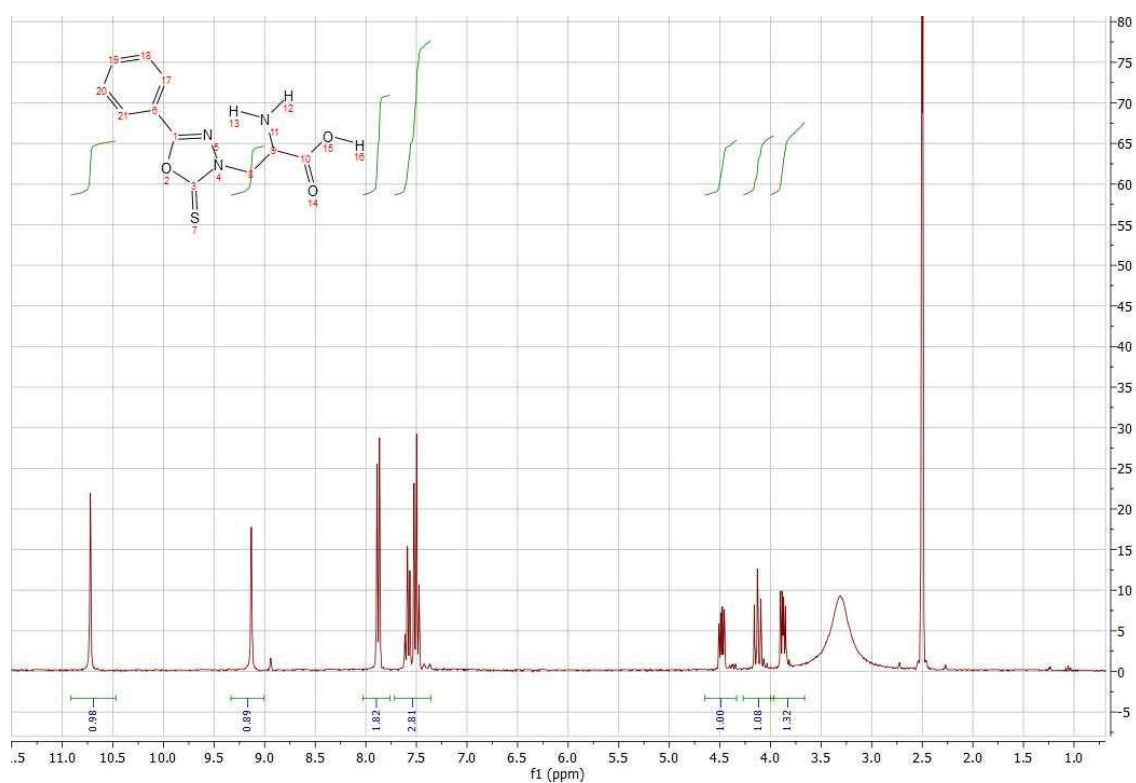

Figure S1.  $^1\text{H}$  NMR spectral analysis of amino acid 5

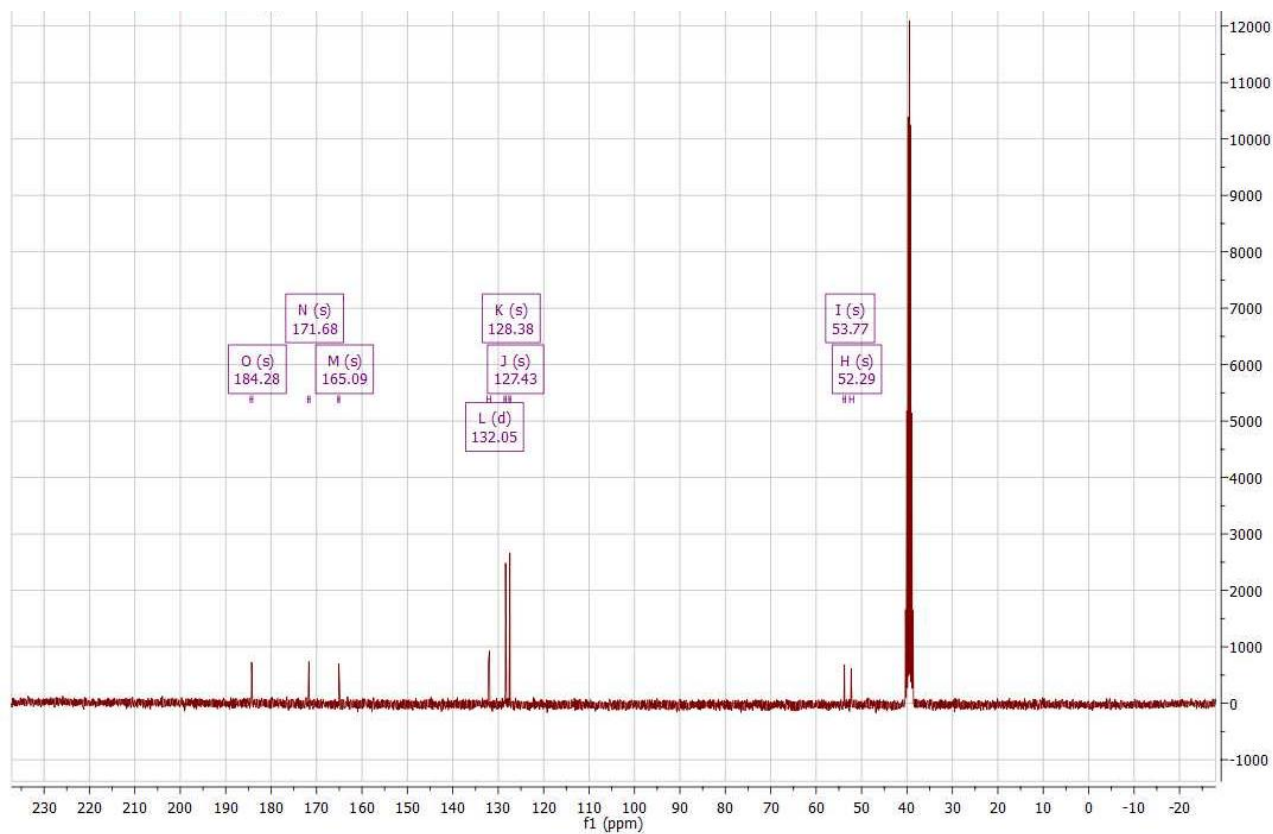

Figure S2.  $^{13}\text{C}$  NMR spectral analysis of amino acid 5

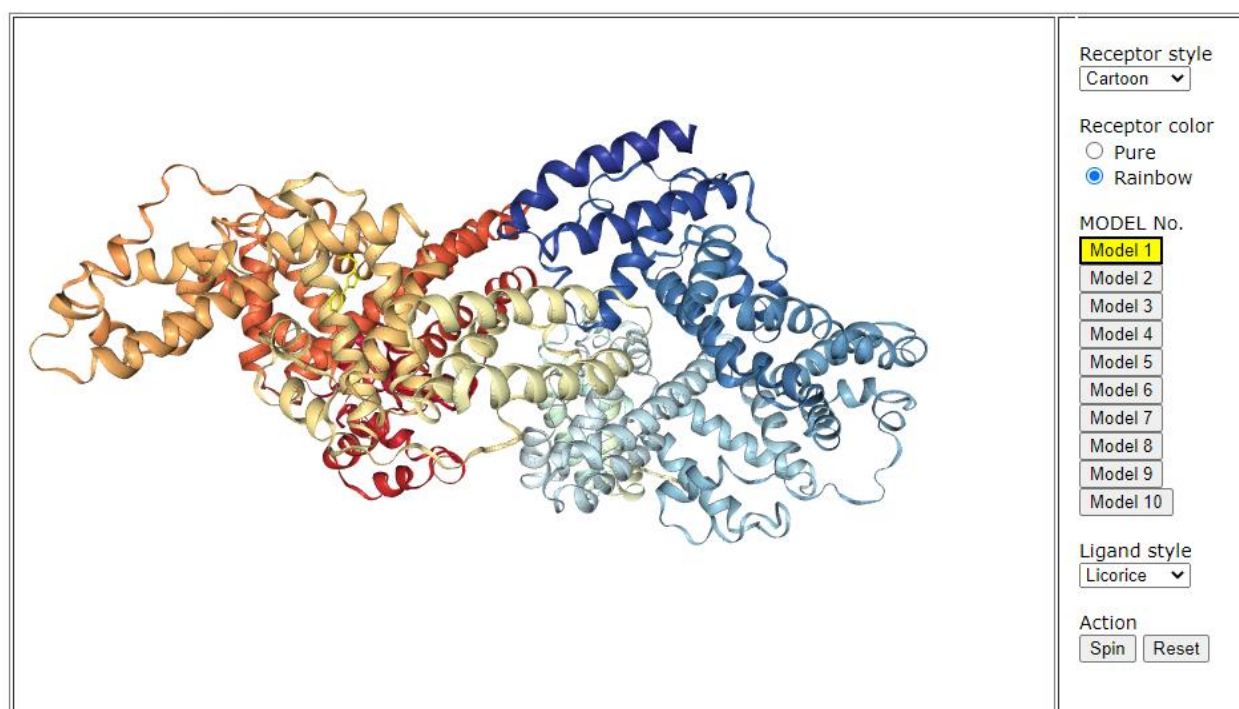

Complex Template Information ([Click to Show](#))

Summary of the Top 10 Models

| Rank          | 1       | 2       | 3       | 4       | 5       | 6       | 7       | 8       | 9       | 10      |
|---------------|---------|---------|---------|---------|---------|---------|---------|---------|---------|---------|
| Docking Score | -140.91 | -137.59 | -135.39 | -131.18 | -130.79 | -125.06 | -121.99 | -118.09 | -118.06 | -117.52 |

**Figure S3.** Three-dimensional view of the complex of 5 with BSA for the model 1 corresponding to the top-1 pose. Notice the variation in docking scores, which range from -117.52 to -140.91, with the top-1 pose corresponding to the model with the best HDock score (-140.91).

**Table S1:** Interface residues (type and number) and distances from the ligand for both A and B chain of BSA for the top-1, top-2 and top-3 poses. Notice how comp 1 binds chain A at level of the subdomain IIIA

|     |      |       |         |
|-----|------|-------|---------|
| LEU | 386A | 4.099 | -140.91 |
| ILE | 387A | 3.834 |         |
| ASN | 390A | 3.293 |         |
| CYS | 391A | 1.865 |         |
| PHE | 394A | 4.986 |         |
| PHE | 402A | 3.559 |         |
| LEU | 406A | 4.290 |         |
| ARG | 409A | 3.910 |         |
| TYR | 410A | 3.203 |         |
| SER | 428A | 4.653 |         |
| LEU | 429A | 1.853 |         |
| GLY | 430A | 4.084 |         |
| LYS | 431A | 4.398 |         |

VAL 432A 2.064

GLY 433A 2.931

THR 434A 4.821

CYS 436A 4.096

CYS 437A 1.635

THR 448A 2.959

LEU 452A 3.823

SER 488A 3.322

LEU 386B 3.710 -137.59

ILE 387B 3.883

ASN 390B 2.817

CYS 391B 1.995

PHE 394B 4.663

PHE 402B 3.100

LEU 406B 4.594

ARG 409B 3.469

TYR 410B 3.429

LYS 413B 4.247

SER 428B 4.543

LEU 429B 1.804

GLY 430B 4.037

LYS 431B 4.743

VAL 432B 2.169

GLY 433B 2.868

THR 434B 4.932

CYS 436B 4.635

CYS 437B 1.864

THR 448B 3.933

LEU 452B 3.249

SER 488B 3.451

PHE 501A 3.070 -135.39

PHE 506A 3.342

PHE 508A 3.893

ALA 527A 4.141

LEU 528A 4.859

LEU 531A 3.376

HIS 534A 2.670

LYS 535A 2.751

VAL 546A 4.352

**PHE** 550A 3.254  
 LEU 574A 3.572  
 VAL 575A 1.908  
 VAL 576A 4.774  
 THR 578A 3.031  
 GLN 579A 2.910  
 LEU 582A 4.388

**Table S2:** Interaction between the target protein and compound 5 for the top-1 pose as visualized by PLIP software

Hydrophobic Interactions ----

| Index | Residue | AA  | Distance | Ligand Atom | Protein Atom |
|-------|---------|-----|----------|-------------|--------------|
| 1     | 410A    | TYR | 3.40     | 9322        | 3305         |
| 2     | 429A    | LEU | 3.99     | 9321        | 3454         |

▼ Hydrogen Bonds —

| Index | Residue | AA  | Distance H-A | Distance D-A | Donor Angle | Protein donor? | Side chain | Donor Atom | Acceptor Atom |
|-------|---------|-----|--------------|--------------|-------------|----------------|------------|------------|---------------|
| 1     | 448A    | THR | 2.17         | 2.96         | 132.56      | ✗              | ✓          | 9309 [N3]  | 3593 [O3]     |

---- Hydrophobic Interaction

— Hydrogen Bond

Peak#:1 R.Time:0.761(Scan#:47)  
 MassPeaks:129  
 Spectrum Mode:Averaged 0.750-0.783(46-48)  
 BG Mode:Calc Segment 1 - Event 1

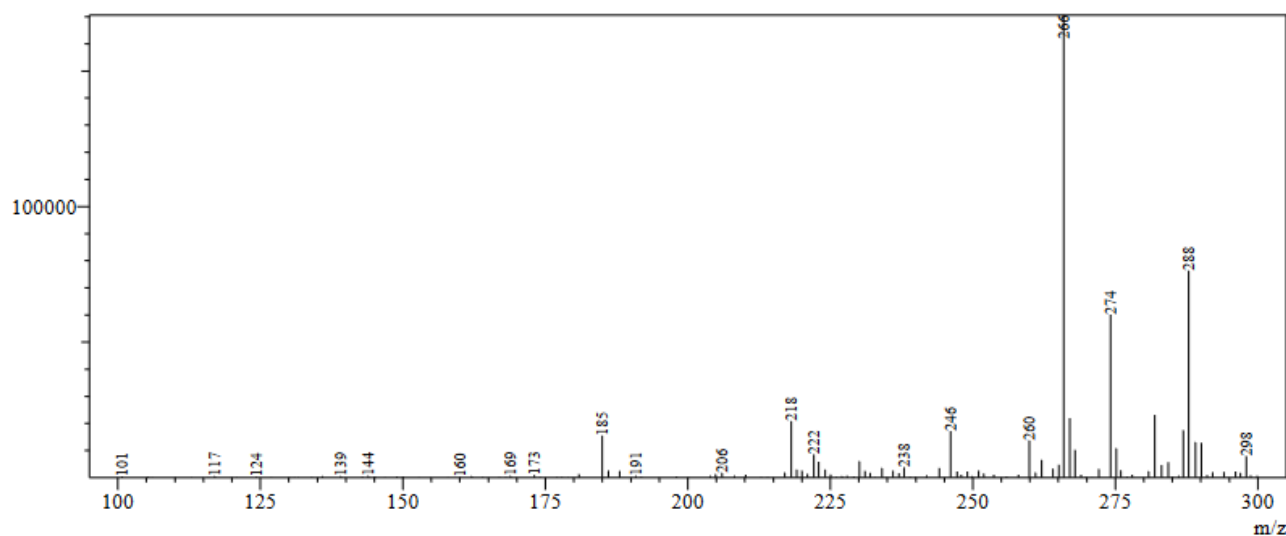

MASS Peak Table TIC

| Peak# | Ret. Time | Area     | Base Peak m/z |
|-------|-----------|----------|---------------|
| 1     | 0.761     | 11187839 | 265.95        |
| Total |           | 11187839 |               |

|                 |                      |              |                                |              |                |      |                      |           |          |
|-----------------|----------------------|--------------|--------------------------------|--------------|----------------|------|----------------------|-----------|----------|
| Title           | With ATR10           | Comment      | With ATR10                     | File Name    | E:\HS.BPA      | Date | 26 Apr 2024 13:42:12 | Technique | Infrared |
| Spectral Region | IR                   | X Axis       | Wavenumber (cm <sup>-1</sup> ) | Y Axis       | %Transmittance |      |                      |           |          |
| Spectrum Range  | 401.1936 - 4000.3645 | Points Count | 934                            | Data Spacing | 3.8576         |      |                      |           |          |

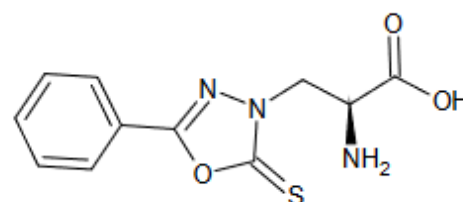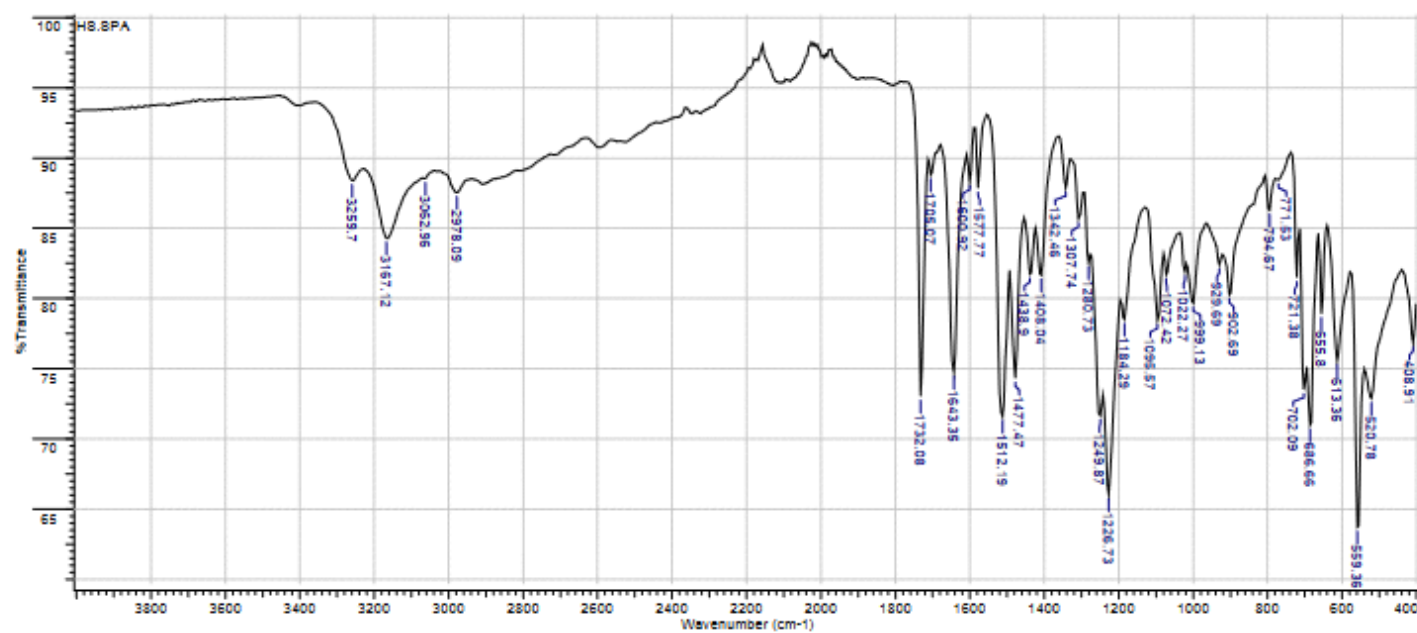

Figure S4. ESI MS (up) and IR (bottom) analysis of compound 5
